# Supplementary material for: Syndromic monogenic diabetes genes should be tested in patients with a clinical suspicion of MODY
Source: PubMed Central journal article supplement (PMC7612420; doi:10.2337/db21-0517), 2022-03-01
Supplement: EMS140031-supplement-Supplementary_tables_1_to_8_and_Supplementary_figure_1.pdf [file EMS140031-supplement-Supplementary_tables_1_to_8_and_Supplementary_figure_1.pdf]

## Supplementary Material

**Supplementary table 1:** List of monogenic diabetes genes and mitochondrial DNA mutation m.3243A>G analysed in this study. \*Common non-syndromic refers to the three most common causes of isolated, non-syndromic monogenic diabetes (MODY) diagnosed outside of the neonatal period (*GCK*, *HNF1A* and *HNF4A*). Non-syndromic specifically relates to heterozygous mutations causing isolated monogenic diabetes, and excludes any syndromes associated with biallelic mutations in the same gene (e.g. heterozygous mutations in *RFX6* cause MODY with reduced penetrance, whereas biallelic mutations cause Mitchell-Riley Syndrome).

| Gene (OMIM)                                     | Category*           | Phenotype                                                                                               | OMIM                   | Inheritance                      | References                                                                                                                                                               |
|-------------------------------------------------|---------------------|---------------------------------------------------------------------------------------------------------|------------------------|----------------------------------|--------------------------------------------------------------------------------------------------------------------------------------------------------------------------|
| <a href="#">ABCC8</a><br><a href="#">600509</a> | Other non-syndromic | MODY                                                                                                    | <a href="#">610374</a> | Dominant                         | <a href="#">Bowman et al 2012 Diabetologia 55: 123-127</a><br><a href="#">Riveline et al 2012 Diabetes Care 35: 248-251</a>                                              |
| <a href="#">CEL</a><br><a href="#">114840</a>   | Syndromic           | MODY and pancreatic exocrine dysfunction                                                                | <a href="#">609812</a> | Dominant                         | <a href="#">Raeder et al 2006 Nat Genet 38: 54-62</a><br><a href="#">Torsvik et al 2010 Hum Genet 127: 55-64</a><br><a href="#">Raeder et al 2013 PLoS One 8: e60229</a> |
| <a href="#">CISD2</a><br><a href="#">611507</a> | Syndromic           | Wolfram Syndrome 2 (diabetes mellitus, hearing loss, optic atrophy and defective platelet aggregation). | <a href="#">604928</a> | Recessive                        | <a href="#">Amr et al 2007 Amr J Hum Genet 81: 673-683</a>                                                                                                               |
| <a href="#">GATA4</a><br><a href="#">600576</a> | Syndromic           | Permanent neonatal diabetes with pancreatic agenesis and congenital heart defects                       | Not yet assigned       | Dominant (often <i>de novo</i> ) | <a href="#">D'Amato et al 2010 Diabet Med 27: 1195-1200</a>                                                                                                              |
| <a href="#">GATA6</a><br><a href="#">601656</a> | Syndromic           | Permanent neonatal diabetes with pancreatic agenesis and congenital heart defects                       | <a href="#">600001</a> | Dominant (often <i>de novo</i> ) | <a href="#">Lango Allen et al 2011 Nat Genet 44: 20-22</a><br><a href="#">De Franco et al 2013 Diabetes 62: 993-997</a>                                                  |

|                                                  |                      |                                                               |                        |                                     |                                                                                                                                                                                                                                                                            |
|--------------------------------------------------|----------------------|---------------------------------------------------------------|------------------------|-------------------------------------|----------------------------------------------------------------------------------------------------------------------------------------------------------------------------------------------------------------------------------------------------------------------------|
| <a href="#">GCK</a><br><a href="#">138079</a>    | Common non-syndromic | MODY                                                          | <a href="#">125851</a> | Dominant                            | <a href="#">Vionnet et al 1992 Nature 356: 721-722</a><br><a href="#">Velho et al 1997 Diabetologia 40: 217-224</a><br><a href="#">Osbak et al 2009 Hum Mutat 30: 1512-1526</a>                                                                                            |
| <a href="#">HNF1A</a><br><a href="#">142410</a>  | Common non-syndromic | MODY                                                          | <a href="#">600496</a> | Dominant                            | <a href="#">Yamagata et al 1996 Nature 384: 455-458</a><br><a href="#">Frayling et al 1997 Diabetes 46: 720-725</a><br><a href="#">Colclough et al 2013 Hum Mutat 34: 669-685</a>                                                                                          |
| <a href="#">HNF1B</a><br><a href="#">189907</a>  | Syndromic            | Renal Cysts and Diabetes syndrome (RCAD)                      | <a href="#">137920</a> | Dominant<br>(often <i>de novo</i> ) | <a href="#">Horikawa et al 1997 Nat Genet 17: 384-385</a><br><a href="#">Yorifuji et al 2004 J Clin Endocrinol Metab 89: 2905-2908</a><br><a href="#">Edghill et al 2006 J Med Genet 43: 84-90</a><br><a href="#">Bellanne-Chantelot et al 2005 Diabetes 54: 3126-3132</a> |
| <a href="#">HNF4A</a><br><a href="#">600281</a>  | Common non-syndromic | MODY                                                          | <a href="#">125850</a> | Dominant                            | <a href="#">Yamagata et al 1996 Nature 384: 458-460</a><br><a href="#">Bulman et al 1997 Diabetologia 40: 859-862</a><br><a href="#">Colclough et al 2013 Hum Mutat 34: 669-685</a>                                                                                        |
| <a href="#">INS</a><br><a href="#">176730</a>    | Other non-syndromic  | MODY                                                          | <a href="#">613370</a> | Dominant                            | <a href="#">Edghill et al 2008 Diabetes 57: 1034-1042</a><br><a href="#">Molven et al 2008 Diabetes 57: 1131-1135</a>                                                                                                                                                      |
| <a href="#">INSR</a><br><a href="#">147670</a>   | Syndromic            | Severe insulin resistance                                     | <a href="#">610549</a> | Dominant                            | <a href="#">Odawara et al 1989 Science 245: 66-68</a>                                                                                                                                                                                                                      |
| <a href="#">KCNJ11</a><br><a href="#">600937</a> | Other non-syndromic  | MODY                                                          | <a href="#">616329</a> | Dominant                            | <a href="#">Yorifuji et al 2005 J Clin Endocrinol Metab 90: 3174-3178</a><br><a href="#">Bonfond et al 2012 PLoS One 7: e37423</a>                                                                                                                                         |
| <a href="#">LMNA</a><br><a href="#">150330</a>   | Syndromic            | Familial Partial Lipodystrophy (FPLD2) and insulin resistance | <a href="#">151660</a> | Dominant                            | <a href="#">Cao et al 2000 Hum Mol Genet 1: 109-112</a><br><a href="#">Shackleton et al 2000 Nat Genet 24: 153-156</a><br><a href="#">Speckman et al 2000 Am J Hum Genet 66: 1192-1198</a>                                                                                 |

|                                                              |                     |                                                                                        |                        |                             |                                                                                                                                                                                                           |
|--------------------------------------------------------------|---------------------|----------------------------------------------------------------------------------------|------------------------|-----------------------------|-----------------------------------------------------------------------------------------------------------------------------------------------------------------------------------------------------------|
| <a href="#">MTTL1</a><br>m.3243A>G<br><a href="#">590050</a> | Syndromic           | Maternally inherited diabetes and deafness (MIDD)                                      | <a href="#">520000</a> | Mitochondrial               | <a href="#">Van den Ouweland <i>et al</i> 1992 Nat Genet 1: 368-371</a><br><a href="#">Murphy <i>et al</i> 2008 Diabet Med 25: 383-399</a>                                                                |
| <a href="#">NEUROD1</a><br><a href="#">601724</a>            | Other non-syndromic | MODY                                                                                   | <a href="#">606394</a> | Dominant                    | <a href="#">Malecki <i>et al</i> 1999 Nat Genet 23: 323-328</a><br><a href="#">Kristinsson <i>et al</i> 2001 Diabetologia 44: 2098-2103</a>                                                               |
| <a href="#">PAX6</a><br><a href="#">607108</a>               | Syndromic           | Aniridia and impaired glucose tolerance                                                | <a href="#">106210</a> | Dominant                    | <a href="#">Yasuda <i>et al</i> 2002 Diabetes 51: 224-230</a><br><a href="#">Nishi <i>et al</i> 2005 Diabet Med 22: 641-644</a><br><a href="#">Osawa <i>et al</i> 2015 J Diabetes Investig 6: 105-106</a> |
| <a href="#">PCBD1</a><br><a href="#">126090</a>              | Syndromic           | Diabetes and hyperphenylalaninaemia                                                    | <a href="#">264070</a> | Recessive                   | <a href="#">Simaite <i>et al</i> 2014 Diabetes 63: 3557-3564</a><br><a href="#">Ferre <i>et al</i> 2014 J Am Soc Nephrol 25: 574-586</a>                                                                  |
| <a href="#">PDX1</a><br><a href="#">600733</a>               | Other non-syndromic | MODY                                                                                   | <a href="#">606392</a> | Dominant                    | <a href="#">Stoffers <i>et al</i> 1997 Nat Genet 17: 138-139</a>                                                                                                                                          |
| <a href="#">PLIN1</a><br><a href="#">170290</a>              | Syndromic           | Familial Partial Lipodystrophy (FPLD4) and insulin resistance                          | <a href="#">613877</a> | Dominant                    | <a href="#">Gandotra <i>et al</i> 2011 N Engl J Med 364: 740-748</a>                                                                                                                                      |
| <a href="#">POLD1</a><br><a href="#">174761</a>              | Syndromic           | Mandibular hypoplasia, deafness, progeroid features, and lipodystrophy (MDPL) syndrome | <a href="#">615381</a> | Dominant ( <i>de novo</i> ) | <a href="#">Weedon <i>et al</i> 2013 Mat Genet 45: 947-950</a>                                                                                                                                            |
| <a href="#">PPARG</a><br><a href="#">601487</a>              | Syndromic           | Familial Partial Lipodystrophy (FPLD3) and insulin resistance                          | <a href="#">604367</a> | Dominant                    | <a href="#">Agarwal <i>et al</i> 2002 J Clin Endocrinol Metab 1: 408-411</a><br><a href="#">Barroso <i>et al</i> 1999 Nature 402: 880-883</a>                                                             |
| <a href="#">RFX6</a><br><a href="#">612659</a>               | Other non-syndromic | MODY with reduced penetrance                                                           | Not yet assigned       | Dominant                    | <a href="#">Patel <i>et al</i> 2017 Nat Commun 8: 888</a>                                                                                                                                                 |

|                                    |           |                                                                                               |                        |                                |                                                                                                                                                      |
|------------------------------------|-----------|-----------------------------------------------------------------------------------------------|------------------------|--------------------------------|------------------------------------------------------------------------------------------------------------------------------------------------------|
| <a href="#">SLC29A3<br/>612373</a> | Syndromic | H syndrome & PHID syndrome                                                                    | <a href="#">602782</a> | Recessive                      | <a href="#">Cliffe <i>et al</i> 2009 Hum Molec Genet 18: 2257-2265</a><br><a href="#">Molho-Pessach <i>et al</i> 2008 Am J Hum Genet 83: 529-534</a> |
| <a href="#">TRMT10A<br/>616013</a> | Syndromic | Juvenile-onset diabetes with microcephaly, epilepsy and intellectual disability               | <a href="#">616033</a> | Recessive                      | <a href="#">Igoillo-Esteve <i>et al</i> 2013 PLoS Genet 9: e1003888</a>                                                                              |
| <a href="#">WFS1<br/>606201</a>    | Syndromic | Wolfram syndrome (Diabetes insipidus, diabetes mellitus, optic atrophy and deafness, DIDMOAD) | <a href="#">222300</a> | Recessive                      | <a href="#">Inoue <i>et al</i> 1998 Nat Genet 20: 143-148</a><br><a href="#">Strom <i>et al</i> 1998 Hum Mol Genet 7: 2021-2028</a>                  |
| <a href="#">ZBTB20<br/>606025</a>  | Syndromic | Primrose syndrome                                                                             | <a href="#">259050</a> | Dominant<br>( <i>de novo</i> ) | <a href="#">Cordeddu <i>et al</i> 2014 Nat Genet 46: 815-817</a>                                                                                     |
| <a href="#">ZFP57<br/>612192</a>   | Syndromic | Transient neonatal diabetes                                                                   | <a href="#">601410</a> | Recessive                      | <a href="#">Mackay <i>et al</i> 2008 Nat Genet 40: 949-951</a>                                                                                       |

**Supplementary Table 2: Clinical characteristics of the whole cohort.** Data is in the format median, (IQR), n for continuous variables and n (%) for categorical variables.

| Characteristic                                 | All probands (n=1280)  |
|------------------------------------------------|------------------------|
| Age at diagnosis (y)                           | 20 (14-29), 1280       |
| Duration (y)                                   | 3 (1-12), 1280         |
| Female                                         | 724 (57%)              |
| BMI (kg/m <sup>2</sup> )                       | 25.7 (22.4-30.0), 1058 |
| Extra-pancreatic features                      | 151 (12%)              |
| Parent with diabetes                           | 873 (68%)              |
| Ethnicity (non-white)                          | 334 (26%)              |
| HbA1c (%)                                      | 7.6 (6.5-9.5), 976     |
| HbA1c (mmol/mol)                               | 60 (48-80)             |
| Insulin alone or with Oral Hypoglycaemic Drugs | 653 (51%)              |

**Supplementary Table 3: Genetic causes of monogenic diabetes in our cohort.** \*Common non-syndromic refers to the three most common causes of isolated, non-syndromic monogenic diabetes (MODY) diagnosed outside of the neonatal period (*GCK*, *HNF1A* and *HNF4A*). Non-syndromic specifically relates to heterozygous mutations causing isolated monogenic diabetes, and excludes any syndromes associated with biallelic mutations in the same gene (e.g. heterozygous mutations in *RFX6* cause MODY with reduced penetrance, whereas biallelic mutations cause Mitchell-Riley Syndrome).

| Gene           | Category of genetic aetiologies* | Number of probands | Proportion of all monogenic diabetes cases |
|----------------|----------------------------------|--------------------|--------------------------------------------|
| <i>HNF1A</i>   | Common non-syndromic             | 98                 | 33%                                        |
| <i>GCK</i>     | Common non-syndromic             | 66                 | 22%                                        |
| <i>HNF4A</i>   | Common non-syndromic             | 42                 | 14%                                        |
| m.3243A>G      | Syndromic                        | 24                 | 8%                                         |
| <i>HNF1B</i>   | Syndromic                        | 18                 | 6%                                         |
| <i>ABCC8</i>   | Other non-syndromic              | 11                 | 4%                                         |
| <i>RFX6</i>    | Other non-syndromic              | 8                  | 3%                                         |
| <i>WFS1</i>    | Syndromic                        | 6                  | 2%                                         |
| <i>INS</i>     | Other non-syndromic              | 6                  | 2%                                         |
| <i>KCNJ11</i>  | Other non-syndromic              | 5                  | 2%                                         |
| <i>INSR</i>    | Syndromic                        | 4                  | 1%                                         |
| <i>NEUROD1</i> | Other non-syndromic              | 3                  | 1%                                         |
| <i>PDX1</i>    | Other non-syndromic              | 2                  | <1%                                        |
| <i>GATA6</i>   | Syndromic                        | 1                  | <1%                                        |
| <i>SLC29A3</i> | Syndromic                        | 1                  | <1%                                        |
| <i>TRMT10A</i> | Syndromic                        | 1                  | <1%                                        |

|              |              |            |     |
|--------------|--------------|------------|-----|
| <i>PPARG</i> | Syndromic    | 1          | <1% |
|              | <b>Total</b> | <b>297</b> |     |

**Supplementary Table 4: List of pathogenic and likely pathogenic variants identified in this study.** All variants described using HGVS nomenclature (<https://varnomen.hgvs.org/>) based on the following NCBI Reference Sequences (RefSeq): *HNF1A* NM\_000545.8, *HNF4A* NM\_175914.4, *GCK* NM\_000162.5, *ABCC8* NM\_001287174.2, *INS* NM\_001185098.2, *KCNJ11* NM\_000525.4, *NEUROD1* NM\_002500.5, *PDX1* NM\_000209.4, *RFX6* NM\_173560.4, *HNF1B* NM\_000458.4, *GATA6* NM\_005257.5, *INSR* NM\_000208.4, *PPARG* NM\_015869.4, *SLC29A3* NM\_018344.5, *TRMT10A* NM\_152292.5, *WFS1* NM\_006005.3 and *MT-TL1* NC\_012920.1.

| Gene         | DNA change        | Protein Change | Zygoty       | Variant type        | Classification    | Number of probands |
|--------------|-------------------|----------------|--------------|---------------------|-------------------|--------------------|
| <i>HNF1A</i> | c.(?_1)_(*1_?)del | p.0?           | Heterozygous | Whole gene deletion | Pathogenic        | 1                  |
| <i>HNF1A</i> | c.-258A>G         | p.0?           | Heterozygous | Regulatory          | Likely Pathogenic | 1                  |
| <i>HNF1A</i> | c.25C>T           | p.(Gln9*)      | Heterozygous | Nonsense            | Pathogenic        | 1                  |
| <i>HNF1A</i> | c.34C>G           | p.(Leu12Val)   | Heterozygous | Missense            | Likely Pathogenic | 1                  |
| <i>HNF1A</i> | c.44C>T           | p.(Ala15Val)   | Heterozygous | Missense            | Likely Pathogenic | 1                  |
| <i>HNF1A</i> | c.46C>G           | p.(Leu16Val)   | Heterozygous | Missense            | Likely Pathogenic | 1                  |
| <i>HNF1A</i> | c.56C>T           | p.(Ser19Leu)   | Heterozygous | Missense            | Likely Pathogenic | 1                  |
| <i>HNF1A</i> | c.58G>A           | p.(Gly20Arg)   | Heterozygous | Missense            | Likely Pathogenic | 1                  |
| <i>HNF1A</i> | c.85G>C           | p.(Ala29Pro)   | Heterozygous | Missense            | Likely Pathogenic | 1                  |
| <i>HNF1A</i> | c.197dup          | p.(Thr67fs)    | Heterozygous | Frameshift          | Pathogenic        | 1                  |
| <i>HNF1A</i> | c.319C>G          | p.(Leu107Val)  | Heterozygous | Missense            | Likely Pathogenic | 1                  |
| <i>HNF1A</i> | c.325C>T          | p.(Gln109*)    | Heterozygous | Nonsense            | Pathogenic        | 1                  |
| <i>HNF1A</i> | c.347C>T          | p.(Ala116Val)  | Heterozygous | Missense            | Pathogenic        | 1                  |
| <i>HNF1A</i> | c.361T>C          | p.(Ser121Pro)  | Heterozygous | Missense            | Likely Pathogenic | 1                  |
| <i>HNF1A</i> | c.375G>T          | p.(Gln125His)  | Heterozygous | Missense            | Likely Pathogenic | 1                  |
| <i>HNF1A</i> | c.382A>G          | p.(Ile128Val)  | Heterozygous | Missense            | Likely Pathogenic | 1                  |

|              |              |               |              |                   |                   |   |
|--------------|--------------|---------------|--------------|-------------------|-------------------|---|
| <i>HNF1A</i> | c.391C>T     | p.(Arg131Trp) | Heterozygous | Missense          | Pathogenic        | 1 |
| <i>HNF1A</i> | c.392G>A     | p.(Arg131Gln) | Heterozygous | Missense          | Pathogenic        | 2 |
| <i>HNF1A</i> | c.476G>A     | p.(Arg159Gln) | Heterozygous | Missense          | Pathogenic        | 2 |
| <i>HNF1A</i> | c.481G>A     | p.(Ala161Thr) | Heterozygous | Missense          | Likely Pathogenic | 1 |
| <i>HNF1A</i> | c.493T>C     | p.(Trp165Arg) | Heterozygous | Missense          | Likely Pathogenic | 1 |
| <i>HNF1A</i> | c.502C>T     | p.(Arg168Cys) | Heterozygous | Missense          | Likely Pathogenic | 1 |
| <i>HNF1A</i> | c.521C>T     | p.(Ala174Val) | Heterozygous | Missense          | Likely Pathogenic | 1 |
| <i>HNF1A</i> | c.526C>T     | p.(Gln176*)   | Heterozygous | Nonsense          | Pathogenic        | 1 |
| <i>HNF1A</i> | c.543del     | p.(Gln182fs)  | Heterozygous | Frameshift        | Pathogenic        | 1 |
| <i>HNF1A</i> | c.591G>T     | p.(Lys197Asn) | Heterozygous | Missense          | Likely Pathogenic | 1 |
| <i>HNF1A</i> | c.598C>T     | p.(Arg200Trp) | Heterozygous | Missense          | Pathogenic        | 2 |
| <i>HNF1A</i> | c.599G>A     | p.(Arg200Gln) | Heterozygous | Missense          | Pathogenic        | 2 |
| <i>HNF1A</i> | c.607C>T     | p.(Arg203Cys) | Heterozygous | Missense          | Pathogenic        | 1 |
| <i>HNF1A</i> | c.608G>A     | p.(Arg203His) | Heterozygous | Missense          | Pathogenic        | 1 |
| <i>HNF1A</i> | c.613A>C     | p.(Lys205Gln) | Heterozygous | Missense          | Likely Pathogenic | 1 |
| <i>HNF1A</i> | c.653A>G     | p.(Tyr218Cys) | Heterozygous | Missense          | Likely Pathogenic | 1 |
| <i>HNF1A</i> | c.673A>C     | p.(Ser225Arg) | Heterozygous | Missense          | Likely Pathogenic | 1 |
| <i>HNF1A</i> | c.685C>T     | p.(Arg229*)   | Heterozygous | Nonsense          | Pathogenic        | 3 |
| <i>HNF1A</i> | c.686G>A     | p.(Arg229Gln) | Heterozygous | Missense          | Pathogenic        | 1 |
| <i>HNF1A</i> | c.718G>C     | p.(Glu240Gln) | Heterozygous | Missense          | Likely Pathogenic | 1 |
| <i>HNF1A</i> | c.779C>T     | p.(Thr260Met) | Heterozygous | Missense          | Pathogenic        | 1 |
| <i>HNF1A</i> | c.809A>G     | p.(Asn270Ser) | Heterozygous | Missense          | Likely Pathogenic | 2 |
| <i>HNF1A</i> | c.811C>T     | p.(Arg271Trp) | Heterozygous | Missense          | Pathogenic        | 2 |
| <i>HNF1A</i> | c.814C>T     | p.(Arg272Cys) | Heterozygous | Missense          | Pathogenic        | 1 |
| <i>HNF1A</i> | c.815G>A     | p.(Arg272His) | Heterozygous | Missense          | Pathogenic        | 1 |
| <i>HNF1A</i> | c.824A>C     | p.(Glu275Ala) | Heterozygous | Missense          | Likely Pathogenic | 1 |
| <i>HNF1A</i> | c.824_826del | p.(Glu275del) | Heterozygous | In-frame deletion | Pathogenic        | 2 |
| <i>HNF1A</i> | c.827C>A     | p.(Ala276Asp) | Heterozygous | Missense          | Likely Pathogenic | 2 |
| <i>HNF1A</i> | c.872del     | p.(Pro291fs)  | Heterozygous | Frameshift        | Pathogenic        | 5 |

|              |                            |               |              |                     |                   |    |
|--------------|----------------------------|---------------|--------------|---------------------|-------------------|----|
| <i>HNF1A</i> | c.872dup                   | p.(Gly292fs)  | Heterozygous | Frameshift          | Pathogenic        | 16 |
| <i>HNF1A</i> | c.873del                   | p.(Pro293fs)  | Heterozygous | Frameshift          | Pathogenic        | 1  |
| <i>HNF1A</i> | c.955+2T>C                 | p.?           | Heterozygous | Aberrant Splicing   | Pathogenic        | 1  |
| <i>HNF1A</i> | c.1058_1059dup             | p.(Thr354fs)  | Heterozygous | Frameshift          | Pathogenic        | 1  |
| <i>HNF1A</i> | c.1107+2T>C                | p.?           | Heterozygous | Aberrant Splicing   | Pathogenic        | 1  |
| <i>HNF1A</i> | c.1136C>G                  | p.(Pro379Arg) | Heterozygous | Missense            | Likely Pathogenic | 2  |
| <i>HNF1A</i> | c.1136_1137del             | p.(Pro379fs)  | Heterozygous | Frameshift          | Pathogenic        | 1  |
| <i>HNF1A</i> | c.1137del                  | p.(Val380fs)  | Heterozygous | Frameshift          | Pathogenic        | 3  |
| <i>HNF1A</i> | c.1205del                  | p.(Asn402fs)  | Heterozygous | Frameshift          | Pathogenic        | 1  |
| <i>HNF1A</i> | c.1276_1277insAGGT         | p.(Phe426*)   | Heterozygous | Nonsense            | Pathogenic        | 1  |
| <i>HNF1A</i> | c.1330_1331del             | p.(Gln444fs)  | Heterozygous | Frameshift          | Pathogenic        | 1  |
| <i>HNF1A</i> | c.1340C>T                  | p.(Pro447Leu) | Heterozygous | Missense            | Pathogenic        | 2  |
| <i>HNF1A</i> | c.1362dup                  | p.(Ser455fs)  | Heterozygous | Frameshift          | Pathogenic        | 1  |
| <i>HNF1A</i> | c.1456C>T                  | p.(Gln486*)   | Heterozygous | Nonsense            | Pathogenic        | 1  |
| <i>HNF1A</i> | c.1501G>A                  | p.(Ala501Thr) | Heterozygous | Missense            | Likely Pathogenic | 1  |
| <i>HNF1A</i> | c.1556C>T                  | p.(Pro519Leu) | Heterozygous | Missense            | Pathogenic        | 1  |
| <i>HNF1A</i> | c.1623G>A                  | p.(Gln541Gln) | Heterozygous | Aberrant Splicing   | Likely Pathogenic | 2  |
| <i>HNF1A</i> | c.1741dup                  | p.(Ala581fs)  | Heterozygous | Frameshift          | Pathogenic        | 1  |
| <i>HNF4A</i> | c.(?_50-4517)_(*1057_?)del | p.0           | Heterozygous | Whole gene deletion | Pathogenic        | 1  |
| <i>HNF4A</i> | c.-178A>G                  | p.0?          | Heterozygous | Regulatory          | Likely Pathogenic | 1  |
| <i>HNF4A</i> | c.-181G>A                  | p.0?          | Heterozygous | Regulatory          | Likely Pathogenic | 1  |
| <i>HNF4A</i> | c.21_22del                 | p.(Leu8fs)    | Heterozygous | Frameshift          | Pathogenic        | 1  |
| <i>HNF4A</i> | c.148T>C                   | p.(Tyr50His)  | Heterozygous | Missense            | Likely Pathogenic | 1  |
| <i>HNF4A</i> | c.150C>G                   | p.(Tyr50*)    | Heterozygous | Nonsense            | Pathogenic        | 1  |
| <i>HNF4A</i> | c.199C>T                   | p.(Arg67Trp)  | Heterozygous | Missense            | Pathogenic        | 1  |
| <i>HNF4A</i> | c.200G>A                   | p.(Arg67Gln)  | Heterozygous | Missense            | Pathogenic        | 2  |
| <i>HNF4A</i> | c.305G>A                   | p.(Gly102Asp) | Heterozygous | Missense            | Likely Pathogenic | 1  |
| <i>HNF4A</i> | c.320C>A                   | p.(Ala107Asp) | Heterozygous | Missense            | Pathogenic        | 1  |
| <i>HNF4A</i> | c.322G>A                   | p.(Val108Ile) | Heterozygous | Missense            | Pathogenic        | 1  |



|              |                    |               |              |                   |                   |   |
|--------------|--------------------|---------------|--------------|-------------------|-------------------|---|
| <i>HNF4A</i> | c.334C>T           | p.(Arg112Trp) | Heterozygous | Missense          | Likely Pathogenic | 1 |
| <i>HNF4A</i> | c.335G>A           | p.(Arg112Gln) | Heterozygous | Missense          | Pathogenic        | 1 |
| <i>HNF4A</i> | c.340C>T           | p.(Arg114Trp) | Heterozygous | Missense          | Pathogenic        | 8 |
| <i>HNF4A</i> | c.341G>A           | p.(Arg114Gln) | Heterozygous | Missense          | Pathogenic        | 3 |
| <i>HNF4A</i> | c.421C>T           | p.(Arg141*)   | Heterozygous | Nonsense          | Pathogenic        | 1 |
| <i>HNF4A</i> | c.469A>C           | p.(Lys157Gln) | Heterozygous | Missense          | Likely Pathogenic | 1 |
| <i>HNF4A</i> | c.482del           | p.(Ser161fs)  | Heterozygous | Frameshift        | Pathogenic        | 1 |
| <i>HNF4A</i> | c.530T>C           | p.(Val177Ala) | Heterozygous | Missense          | Likely Pathogenic | 1 |
| <i>HNF4A</i> | c.572del           | p.(Leu191fs)  | Heterozygous | Frameshift        | Pathogenic        | 1 |
| <i>HNF4A</i> | c.577G>T           | p.(Asp193Tyr) | Heterozygous | Missense          | Pathogenic        | 1 |
| <i>HNF4A</i> | c.691C>T           | p.(Arg231Trp) | Heterozygous | Missense          | Pathogenic        | 1 |
| <i>HNF4A</i> | c.740T>C           | p.(Leu247Pro) | Heterozygous | Missense          | Pathogenic        | 2 |
| <i>HNF4A</i> | c.805G>C           | p.(Ala269Pro) | Heterozygous | Missense          | Likely Pathogenic | 1 |
| <i>HNF4A</i> | c.823C>T           | p.(Pro275Ser) | Heterozygous | Missense          | Likely Pathogenic | 1 |
| <i>HNF4A</i> | c.881A>C           | p.(Gln294Pro) | Heterozygous | Missense          | Likely Pathogenic | 1 |
| <i>HNF4A</i> | c.918T>G           | p.(Tyr306*)   | Heterozygous | Nonsense          | Pathogenic        | 1 |
| <i>HNF4A</i> | c.925C>T           | p.(Arg309Cys) | Heterozygous | Missense          | Pathogenic        | 2 |
| <i>HNF4A</i> | c.1040T>C          | p.(Leu347Pro) | Heterozygous | Missense          | Likely Pathogenic | 1 |
| <i>GCK</i>   | c.45+1G>T          | p.?           | Heterozygous | Aberrant Splicing | Pathogenic        | 1 |
| <i>GCK</i>   | c.74T>G            | p.(Leu25Arg)  | Heterozygous | Missense          | Likely Pathogenic | 1 |
| <i>GCK</i>   | c.122T>C           | p.(Met41Thr)  | Heterozygous | Missense          | Pathogenic        | 1 |
| <i>GCK</i>   | c.149A>T           | p.(His50Leu)  | Heterozygous | Missense          | Likely Pathogenic | 1 |
| <i>GCK</i>   | c.162T>G           | p.(Ser54Arg)  | Heterozygous | Missense          | Likely Pathogenic | 1 |
| <i>GCK</i>   | c.183C>A           | p.(Tyr61*)    | Heterozygous | Nonsense          | Pathogenic        | 1 |
| <i>GCK</i>   | c.181_183delinsCAA | p.(Tyr61Gln)  | Heterozygous | Missense          | Likely Pathogenic | 1 |
| <i>GCK</i>   | c.238G>A           | p.(Gly80Ser)  | Heterozygous | Missense          | Likely Pathogenic | 1 |
| <i>GCK</i>   | c.297G>A           | p.(Trp99*)    | Heterozygous | Nonsense          | Pathogenic        | 1 |
| <i>GCK</i>   | c.356C>A           | p.(Ala119Asp) | Heterozygous | Missense          | Likely Pathogenic | 1 |
| <i>GCK</i>   | c.389T>C           | p.(Ile130Thr) | Heterozygous | Missense          | Likely Pathogenic | 1 |

|     |                   |               |              |                   |                   |   |
|-----|-------------------|---------------|--------------|-------------------|-------------------|---|
| GCK | c.435_436dup      | p.(Leu146fs)  | Heterozygous | Frameshift        | Pathogenic        | 1 |
| GCK | c.449T>C          | p.(Phe150Ser) | Heterozygous | Missense          | Pathogenic        | 3 |
| GCK | c.458C>A          | p.(Pro153His) | Heterozygous | Missense          | Pathogenic        | 1 |
| GCK | c.478G>A          | p.(Asp160Asn) | Heterozygous | Missense          | Pathogenic        | 2 |
| GCK | c.478G>C          | p.(Asp160His) | Heterozygous | Missense          | Pathogenic        | 2 |
| GCK | c.483+2_483+16del | p.?           | Heterozygous | Aberrant Splicing | Pathogenic        | 2 |
| GCK | c.540T>G          | p.(Asn180Lys) | Heterozygous | Missense          | Pathogenic        | 1 |
| GCK | c.544G>A          | p.(Val182Met) | Heterozygous | Missense          | Pathogenic        | 1 |
| GCK | c.556C>T          | p.(Arg186*)   | Heterozygous | Nonsense          | Pathogenic        | 1 |
| GCK | c.571C>T          | p.(Arg191Trp) | Heterozygous | Missense          | Pathogenic        | 4 |
| GCK | c.579G>T          | p.(Gly193Gly) | Heterozygous | Aberrant Splicing | Likely Pathogenic | 1 |
| GCK | c.605T>G          | p.(Met202Arg) | Heterozygous | Missense          | Likely Pathogenic | 1 |
| GCK | c.617C>T          | p.(Thr206Met) | Heterozygous | Missense          | Pathogenic        | 1 |
| GCK | c.645C>G          | p.(Tyr215*)   | Heterozygous | Nonsense          | Pathogenic        | 1 |
| GCK | c.667G>A          | p.(Gly223Ser) | Heterozygous | Missense          | Pathogenic        | 1 |
| GCK | c.676G>A          | p.(Val226Met) | Heterozygous | Missense          | Pathogenic        | 1 |
| GCK | c.679+1G>A        | p.?           | Heterozygous | Aberrant Splicing | Pathogenic        | 1 |
| GCK | c.704T>C          | p.(Met235Thr) | Heterozygous | Missense          | Pathogenic        | 4 |
| GCK | c.766G>A          | p.(Glu256Lys) | Heterozygous | Missense          | Pathogenic        | 2 |
| GCK | c.772G>A          | p.(Gly258Ser) | Heterozygous | Missense          | Pathogenic        | 1 |
| GCK | c.772G>T          | p.(Gly258Cys) | Heterozygous | Missense          | Likely Pathogenic | 1 |
| GCK | c.781G>C          | p.(Gly261Arg) | Heterozygous | Missense          | Pathogenic        | 1 |
| GCK | c.812T>C          | p.(Leu271Pro) | Heterozygous | Missense          | Likely Pathogenic | 1 |
| GCK | c.834C>A          | p.(Asp278Glu) | Heterozygous | Missense          | Likely Pathogenic | 1 |
| GCK | c.852C>A          | p.(Pro284Pro) | Heterozygous | Aberrant Splicing | Likely Pathogenic | 1 |
| GCK | c.852del          | p.(Gly285fs)  | Heterozygous | Frameshift        | Pathogenic        | 1 |
| GCK | c.864-1G>A        | p.?           | Heterozygous | Aberrant Splicing | Pathogenic        | 1 |
| GCK | c.868G>A          | p.(Glu290Lys) | Heterozygous | Missense          | Likely Pathogenic | 1 |
| GCK | c.878T>G          | p.(Ile293Arg) | Heterozygous | Missense          | Likely Pathogenic | 1 |

|              |                         |                        |                       |                              |                                |   |
|--------------|-------------------------|------------------------|-----------------------|------------------------------|--------------------------------|---|
| <i>GCK</i>   | c.895G>A                | p.(Gly299Ser)          | Heterozygous          | Missense                     | Likely Pathogenic              | 1 |
| <i>GCK</i>   | c.895G>C                | p.(Gly299Arg)          | Heterozygous          | Missense                     | Pathogenic                     | 1 |
| <i>GCK</i>   | c.896G>A                | p.(Gly299Asp)          | Heterozygous          | Missense                     | Pathogenic                     | 1 |
| <i>GCK</i>   | c.1007C>T               | p.(Ser336Leu)          | Heterozygous          | Missense                     | Likely Pathogenic              | 1 |
| <i>GCK</i>   | c.1019+2T>G             | p.?                    | Heterozygous          | Aberrant Splicing            | Pathogenic                     | 1 |
| <i>GCK</i>   | c.1039C>T               | p.(Gln347*)            | Heterozygous          | Nonsense                     | Pathogenic                     | 1 |
| <i>GCK</i>   | c.1099G>A               | p.(Val367Met)          | Heterozygous          | Missense                     | Likely Pathogenic              | 1 |
| <i>GCK</i>   | c.1133C>A               | p.(Ala378Asp)          | Heterozygous          | Missense                     | Likely Pathogenic              | 1 |
| <i>GCK</i>   | c.1153G>C               | p.(Gly385Arg)          | Heterozygous          | Missense                     | Likely Pathogenic              | 1 |
| <i>GCK</i>   | c.1174C>T               | p.(Arg392Cys)          | Heterozygous          | Missense                     | Pathogenic                     | 1 |
| <i>GCK</i>   | c.1345G>A               | p.(Ala449Thr)          | Heterozygous          | Missense                     | Pathogenic                     | 1 |
| <i>GCK</i>   | c.1346C>A               | p.(Ala449Glu)          | Heterozygous          | Missense                     | Likely Pathogenic              | 1 |
| <i>GCK</i>   | c.1358C>G               | p.(Ser453Trp)          | Heterozygous          | Missense                     | Pathogenic                     | 1 |
| <i>GCK</i>   | c.1364T>A               | p.(Val455Glu)          | Heterozygous          | Missense                     | Pathogenic                     | 1 |
| <i>ABCC8</i> | c.617C>T                | p.(Pro206Leu)          | Heterozygous          | Missense                     | Likely Pathogenic              | 1 |
| <i>ABCC8</i> | c.2476C>T               | p.(Arg826Trp)          | Heterozygous          | Missense                     | Pathogenic                     | 2 |
| <i>ABCC8</i> | c.2977C>T               | p.(Arg993Cys)          | Heterozygous          | Missense                     | Likely Pathogenic              | 1 |
| <i>ABCC8</i> | c.3547C>T               | p.(Arg1183Trp)         | Heterozygous          | Missense                     | Pathogenic                     | 1 |
| <i>ABCC8</i> | c.3629G>A and 4311-2A>G | p.(Gly1210Glu) and p.? | Compound Heterozygous | Missense & Aberrant Splicing | Likely Pathogenic & Pathogenic | 1 |
| <i>ABCC8</i> | c.4139G>C               | p.(Arg1380Pro)         | Heterozygous          | Missense                     | Likely Pathogenic              | 1 |
| <i>ABCC8</i> | c.4139G>A               | p.(Arg1380His)         | Heterozygous          | Missense                     | Pathogenic                     | 1 |
| <i>ABCC8</i> | c.4522G>A               | p.(Ala1508Thr)         | Heterozygous          | Missense                     | Likely Pathogenic              | 1 |
| <i>ABCC8</i> | c.4661G>A               | p.(Arg1554Gln)         | Heterozygous          | Missense                     | Likely Pathogenic              | 1 |
| <i>ABCC8</i> | c.4610C>T               | p.(Ala1537Val)         | Heterozygous          | Missense                     | Likely Pathogenic              | 1 |
| <i>INS</i>   | c.83_88del              | p.(Gln28_His29del)     | Heterozygous          | In-frame deletion            | Likely Pathogenic              | 1 |
| <i>INS</i>   | c.137G>A                | p.(Arg46Gln)           | Heterozygous          | Missense                     | Pathogenic                     | 1 |
| <i>INS</i>   | c.163C>T                | p.(Arg55Cys)           | Heterozygous          | Missense                     | Pathogenic                     | 2 |
| <i>INS</i>   | c.254_255delinsGT       | p.(Ser85Cys)           | Heterozygous          | Missense                     | Likely Pathogenic              | 1 |

|                |                                  |                  |               |                                |                   |    |
|----------------|----------------------------------|------------------|---------------|--------------------------------|-------------------|----|
| <i>INS</i>     | c.331T>G                         | p.(*111Gluext*?) | Heterozygous  | Stop-loss                      | Likely Pathogenic | 1  |
| <i>KCNJ11</i>  | c.287C>T                         | p.(Ala96Val)     | Heterozygous  | Missense                       | Likely Pathogenic | 1  |
| <i>KCNJ11</i>  | c.481G>A                         | p.(Ala161Thr)    | Heterozygous  | Missense                       | Likely Pathogenic | 1  |
| <i>KCNJ11</i>  | c.685G>A                         | p.(Glu229Lys)    | Heterozygous  | Missense                       | Pathogenic        | 1  |
| <i>KCNJ11</i>  | c.754G>A                         | p.(Val252Met)    | Heterozygous  | Missense                       | Likely Pathogenic | 1  |
| <i>KCNJ11</i>  | c.964G>A                         | p.(Glu322Lys)    | Heterozygous  | Missense                       | Likely Pathogenic | 1  |
| <i>NEUROD1</i> | c.328G>A                         | p.(Glu110Lys)    | Heterozygous  | Missense                       | Likely Pathogenic | 1  |
| <i>NEUROD1</i> | c.616dupC                        | p.(His206fs)     | Heterozygous  | Frameshift                     | Likely Pathogenic | 2  |
| <i>PDX1</i>    | c.217dup                         | p.(Leu73fs)      | Heterozygous  | Frameshift                     | Likely Pathogenic | 1  |
| <i>PDX1</i>    | c.218del                         | p.(Leu73fs)      | Heterozygous  | Frameshift                     | Likely Pathogenic | 1  |
| <i>RFX6</i>    | c.73C>T                          | p.(Gln25*)       | Heterozygous  | Nonsense                       | Pathogenic        | 2  |
| <i>RFX6</i>    | c.164dup                         | p.(Glu56fs)      | Heterozygous  | Frameshift                     | Pathogenic        | 1  |
| <i>RFX6</i>    | c.221C>G                         | p.(Ser74*)       | Heterozygous  | Nonsense                       | Pathogenic        | 1  |
| <i>RFX6</i>    | c.438T>G                         | p.(Tyr146*)      | Heterozygous  | Nonsense                       | Pathogenic        | 1  |
| <i>RFX6</i>    | c.875T>G                         | p.(Leu292*)      | Heterozygous  | Nonsense                       | Pathogenic        | 1  |
| <i>RFX6</i>    | c.1028T>G                        | p.(Leu343*)      | Heterozygous  | Nonsense                       | Pathogenic        | 2  |
| <i>MT-TL1</i>  | m.3243A>G                        | N/A              | Heteroplasmic | N/A                            | Pathogenic        | 24 |
| <i>HNF1B</i>   | c.(?_1)_(*4_?)del                | p.0?             | Heterozygous  | Whole gene deletion            | Pathogenic        | 14 |
| <i>HNF1B</i>   | c.22del                          | p.(Leu8fs)       | Heterozygous  | Frameshift                     | Pathogenic        | 1  |
| <i>HNF1B</i>   | c.374T>C                         | p.(Ile125Thr)    | Heterozygous  | Missense                       | Likely Pathogenic | 1  |
| <i>HNF1B</i>   | c.544+3_544+6del                 | p.?              | Heterozygous  | Aberrant Splicing              | Pathogenic        | 1  |
| <i>HNF1B</i>   | c.(544+1_545-1)_(809+1_810-1)del | p.?              | Heterozygous  | Partial gene deletion (exon 3) | Pathogenic        | 1  |
| <i>GATA6</i>   | c.214G>T                         | p.(Gly72*)       | Heterozygous  | Nonsense                       | Pathogenic        | 1  |
| <i>INSR</i>    | c.3089G>T                        | p.(Gly1030Val)   | Heterozygous  | Missense                       | Pathogenic        | 1  |
| <i>INSR</i>    | c.3164C>T                        | p.(Ala1055Val)   | Heterozygous  | Missense                       | Pathogenic        | 2  |
| <i>INSR</i>    | c.3356G>A                        | p.(Arg1119Gln)   | Heterozygous  | Missense                       | Pathogenic        | 1  |
| <i>PPARG</i>   | c.1245del                        | p.(Phe415fs)     | Heterozygous  | Frameshift                     | Pathogenic        | 1  |
| <i>SLC29A3</i> | c.1330G>T                        | p.(Glu444*)      | Homozygous    | Nonsense                       | Pathogenic        | 1  |

|                |                               |                                 |                       |                         |            |   |
|----------------|-------------------------------|---------------------------------|-----------------------|-------------------------|------------|---|
| <i>TRMT10A</i> | c.79G>T                       | p.(Glu27*)                      | Homozygous            | Nonsense                | Pathogenic | 1 |
| <i>WFS1</i>    | c.1885C>T                     | p.(Arg629Trp)                   | Homozygous            | Missense                | Pathogenic | 1 |
| <i>WFS1</i>    | c.2053C>T and c.2254G>T       | p.(Arg685Cys) and p.(Glu752*)   | Compound Heterozygous | Missense and Nonsense   | Pathogenic | 1 |
| <i>WFS1</i>    | c.1107_1108insA and c.1456C>T | p.(Ala370fs) and p.(Gln486*)    | Compound Heterozygous | Frameshift and Nonsense | Pathogenic | 1 |
| <i>WFS1</i>    | c.1433G>A                     | p.(Trp478*)                     | Homozygous            | Nonsense                | Pathogenic | 1 |
| <i>WFS1</i>    | c.698_707del                  | p.(Leu233fs)                    | Homozygous            | Frameshift              | Pathogenic | 1 |
| <i>WFS1</i>    | c.2020G>A and c.2170C>T       | p.(Gly674Arg) and p.(Pro724Ser) | Compound Heterozygous | Missense                | Pathogenic | 1 |

**Supplementary Table 5: Clinical characteristics of m.3243A>G diabetes patients diagnosed in the suspected MODY cohort and diagnosed when clinically suspected with MIDD.** Data is in the format median, (IQR), n for continuous variables and n (%) for categorical variables.

| Characteristic                                          | m.3243A>G patients identified in a suspected MODY cohort (n=24) | Patients with m.3243A>G identified when clinically suspected of having MIDD (n=54) | <i>P</i> |
|---------------------------------------------------------|-----------------------------------------------------------------|------------------------------------------------------------------------------------|----------|
| Age at diagnosis (y)                                    | 28 (22-34.5), 24                                                | 33.5 (26-39), 54                                                                   | 0.09     |
| Duration (y)                                            | 2 (1-7.5), 24                                                   | 6 (2-15), 54                                                                       | 0.05     |
| Female                                                  | 18 (75%)                                                        | 32 (59%)                                                                           | 0.21     |
| BMI (kg/m <sup>2</sup> )                                | 20.7 (19.5-23.4), 19                                            | 21.6 (18.9-24.4) 42                                                                | 0.89     |
| Any other extra-pancreatic feature (excluding deafness) | 0 (0%)                                                          | 43 (80%)                                                                           | <0.001   |
| Deafness                                                | 2 (9%)                                                          | 42 (78%)                                                                           | <0.001   |
| Neurological (seizures, epilepsy, DD, autism, LD)       | 0 (0%)                                                          | 3 (6%)                                                                             | 0.33     |
| Cardiomyopathy                                          | 0 (0%)                                                          | 4 (7%)                                                                             | 0.22     |
| renal disease                                           | 0 (0%)                                                          | 3 (6%)                                                                             | 0.49     |
| myopathy/muscle weakness                                | 0 (0%)                                                          | 2 (4%)                                                                             | 0.48     |
| Retinal changes                                         | 0 (0%)                                                          | 6 (11%)                                                                            | 0.3      |
| Lactic acidosis                                         | 0 (0%)                                                          | 2 (4%)                                                                             | 0.48     |

|                                       |                   |                   |        |
|---------------------------------------|-------------------|-------------------|--------|
| maternal family history of deafness   | 1 (4%)            | 35 (65%)          | <0.001 |
| mother with diabetes                  | 17 (71%)          | 41 (76%)          | 0.53   |
| Ethnicity (non-white)                 | 5 (21%)           | 5 (9%)            | 0.26   |
| HbA1c (%)                             | 7.5 (6.6-8.2), 16 | 7.5 (6.9-9.1), 36 | 0.68   |
| HbA1c (mmol/mol)                      | 58 (49-66)        | 58 (52-76)        | 0.68   |
| Insulin treated                       | 15 (63%)          | 42 (78%)          | 0.17   |
| Insulin alone                         | 13                | 34                |        |
| Insulin with Oral Hypoglycaemic Drugs | 2                 | 8                 |        |

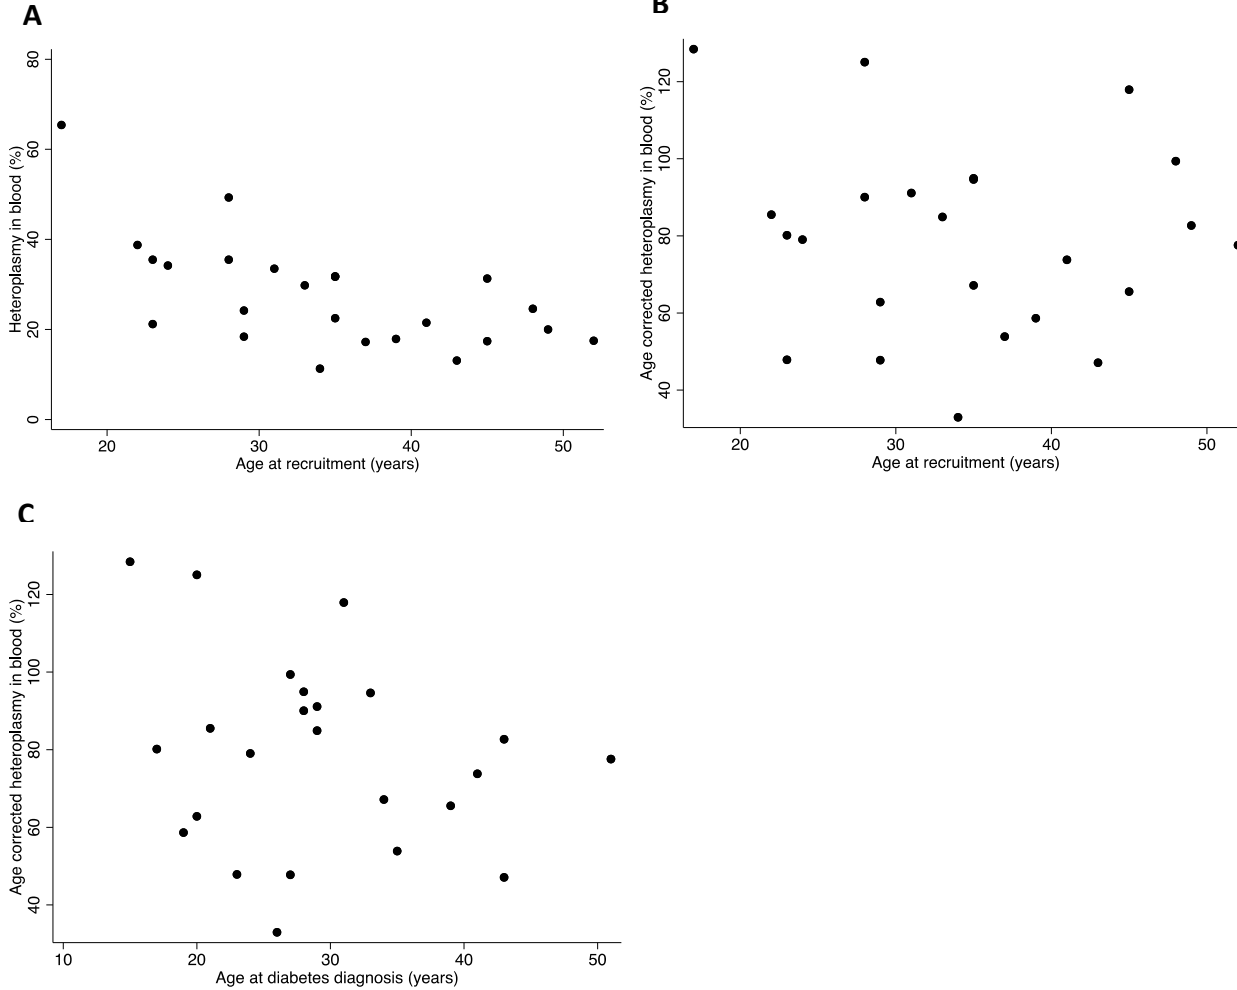

**Supplementary Figure 1: Blood heteroplasmy level of m.3243A>G in patients with suspected MODY.** A) Scatter graph showing percentage blood heteroplasmy against age at genetic testing. B) Scatter graph showing age-adjusted percentage blood heteroplasmy against age at genetic testing. C) Scatter graph showing age-adjusted percentage blood heteroplasmy against age at diagnosis. Blood heteroplasmy was adjusted for age using the published tool available at [https://newcastle-mito-apps.shinyapps.io/m3243ag\\_heteroplasmy\\_tool/](https://newcastle-mito-apps.shinyapps.io/m3243ag_heteroplasmy_tool/).

**Supplementary Table 6: Clinical characteristics of patients with an *HNF1B* mutation diagnosed in a suspected MODY cohort and diagnosed when clinically suspected.** Data is in the format median, (IQR), n for continuous variables and n (%) for categorical variables.

| Characteristic                                            | Patients with an <i>HNF1B</i> mutation identified in a suspected MODY cohort (n=18) | Patients with an <i>HNF1B</i> mutation identified when clinically suspected of having <i>HNF1B</i> -related disease (n=50) | P      |
|-----------------------------------------------------------|-------------------------------------------------------------------------------------|----------------------------------------------------------------------------------------------------------------------------|--------|
| Age at diagnosis (y)                                      | 17 (12-25), 18                                                                      | 18 (13-27), 50                                                                                                             | 0.58   |
| Duration (y)                                              | 3.5 (1-9), 18                                                                       | 3 (1-8), 50                                                                                                                | 0.57   |
| Female                                                    | 11 (61%)                                                                            | 24 (48%)                                                                                                                   | 0.25   |
| BMI (kg/m <sup>2</sup> )                                  | 23.2 (19.5-28.7), 16                                                                | 24.4 (21.5-25.9), 28                                                                                                       | 0.97   |
| Any extra-pancreatic feature                              | 2 (11%)                                                                             | 47 (94%)                                                                                                                   | <0.001 |
| Structural kidney disease                                 | 0 (0%)                                                                              | 42 (84%)                                                                                                                   | <0.001 |
| genital tract malformations                               | 1 (6%)                                                                              | 8 (16%)                                                                                                                    | 0.25   |
| Developmental delay                                       | 0 (0%)                                                                              | 5 (10%)                                                                                                                    | 0.47   |
| Neurological Complications (DD, Seizures, autism, LD etc) | 1 (6%)                                                                              | 6 (12%)                                                                                                                    | 0.40   |
| exocrine pancreas deficiency                              | 0 (0%)                                                                              | 8 (16%)                                                                                                                    | 0.07   |
| Gout                                                      | 0 (0%)                                                                              | 2 (4%)                                                                                                                     | 0.54   |
| Hypomagnesemia                                            | 0 (0%)                                                                              | 7 (14%)                                                                                                                    | 0.10   |
| Parent with diabetes                                      | 8 (44%)                                                                             | 17 (34%)                                                                                                                   | 0.57   |
| Ethnicity (non-white)                                     | 3 (17%)                                                                             | 6 (12%)                                                                                                                    | 0.69   |
| HbA1c (%)                                                 | 6.7 (6.5-11.6), 15                                                                  | 7.2 (6.2-8.6), 30                                                                                                          | 0.95   |
| HbA1c (mmol/mol)                                          | 50 (48-103)                                                                         | 55 (44-71)                                                                                                                 | 0.95   |
| Insulin treated                                           | 14 (78%)                                                                            | 27 (54%)                                                                                                                   | 0.10   |
| Insulin alone                                             | 10                                                                                  | 23                                                                                                                         |        |
| Insulin with Oral Hypoglycaemic Drugs                     | 4                                                                                   | 4                                                                                                                          |        |
| Mutation type                                             |                                                                                     |                                                                                                                            | 0.09   |
| Missense                                                  | 1 (5%)                                                                              | 12 (24%)                                                                                                                   |        |



|                                   |          |          |  |
|-----------------------------------|----------|----------|--|
| Protein truncating (null) variant | 3 (17%)  | 14 (28%) |  |
| Partial or whole gene deletion    | 14 (78%) | 24 (48%) |  |

**Supplementary Table 7: Clinical characteristics of patients with an *HNF1B* gene deletion detected in patients with suspected MODY and patients with suspected *HNF1B*-related disease.** Data is in the format median, (IQR), n for continuous variables and n (%) for categorical variables.

| Characteristic                                            | Patients with an <i>HNF1B</i> deletion identified in a suspected MODY cohort (n=14) | Patients with an <i>HNF1B</i> deletion identified when clinically suspected of having <i>HNF1B</i> -related disease (n=24) | <i>P</i> |
|-----------------------------------------------------------|-------------------------------------------------------------------------------------|----------------------------------------------------------------------------------------------------------------------------|----------|
| Age at diagnosis (y)                                      | 17 (13-25)                                                                          | 20 (15-27)                                                                                                                 | 0.29     |
| Duration (y)                                              | 3.5 (1-9)                                                                           | 3 (1-5)                                                                                                                    | 0.76     |
| Female                                                    | 9 (64%)                                                                             | 12 (50%)                                                                                                                   | 0.50     |
| BMI (kg/m <sup>2</sup> )                                  | 24.6 (18.5-29.9), 12                                                                | 24 (20.8-24.9), 15                                                                                                         | 0.55     |
| Any extra-pancreatic feature                              | 2 (14%)                                                                             | 23 (96%)                                                                                                                   | <0.001   |
| Structural kidney disease                                 | 0 (0%)                                                                              | 18 (74%)                                                                                                                   | <0.001   |
| genital tract malformations                               | 1 (7%)                                                                              | 5 (21%)                                                                                                                    | 0.38     |
| Developmental delay                                       | 1 (7%)                                                                              | 4 (17%)                                                                                                                    | 0.63     |
| Neurological Complications (DD, Seizures, autism, LD etc) | 1 (7%)                                                                              | 5 (21%)                                                                                                                    | 0.38     |
| exocrine pancreas deficiency                              | 0 (0%)                                                                              | 5 (21%)                                                                                                                    | 0.13     |
| Gout                                                      | 0 (0%)                                                                              | 0 (0%)                                                                                                                     | N/A      |
| Hypomagnesemia                                            | 0 (0%)                                                                              | 4 (17%)                                                                                                                    | 0.27     |
| Parent with diabetes                                      | 3 (21%)                                                                             | 17 (34%)                                                                                                                   | 0.65     |
| Ethnicity (non-white)                                     | 3 (21%)                                                                             | 3 (13%)                                                                                                                    | 0.64     |
| HbA1c (%)                                                 | 7.1 (6.5-12), 12                                                                    | 7.4 (6.2-8.6), 17                                                                                                          | 0.46     |
| HbA1c (mmol/mol)                                          | 55 (48-108)                                                                         | 57 (44-70)                                                                                                                 | 0.46     |

|                                       |          |          |      |
|---------------------------------------|----------|----------|------|
| Insulin treated                       | 11 (79%) | 13 (54%) | 0.17 |
| Insulin alone                         | 7        | 11       |      |
| Insulin with Oral Hypoglycaemic Drugs | 4        | 2        |      |

**Supplementary Table 8: Clinical characteristics of patients with mutations in syndromic monogenic diabetes genes other than m.3243A>G and *HNF1B***

| Gene           | DNA change             | Protein Change | Zygosity     | Ethnicity     | Age diabetes diagnosis (years) | Current Treatment | Family History                                                                                           | Extra-pancreatic features reported at referral | Extra-pancreatic features known to clinician but not reported at referral                        | Age at time of referral/age at time of follow up (years) | Additional extra-pancreatic features reported at follow-up                                                                                     |
|----------------|------------------------|----------------|--------------|---------------|--------------------------------|-------------------|----------------------------------------------------------------------------------------------------------|------------------------------------------------|--------------------------------------------------------------------------------------------------|----------------------------------------------------------|------------------------------------------------------------------------------------------------------------------------------------------------|
| <i>GATA6</i>   | NM_005257.5:c.214 G>T  | p.(Gly72*)     | Heterozygous | White British | 13                             | Insulin alone     | Mother GDM, maternal grandfather type 2 DM.                                                              | None                                           | None                                                                                             | 14/17                                                    | None                                                                                                                                           |
| <i>INSR</i>    | NM_000208.4:c.308 9G>T | p.(Gly1030Val) | Heterozygous | White British | 12                             | None              | Paternal Grandfather type 2 DM.                                                                          | None                                           | Acanthosis nigricans, PCOS.                                                                      | 17/22                                                    | raised C-peptide (3605pmol/L)                                                                                                                  |
| <i>INSR</i>    | NM_000208.4:c.316 4C>T | p.(Ala1055Val) | Heterozygous | White British | 18                             | None              | Mother, father, maternal uncle, paternal uncle and maternal grandfather type 2 DM.                       | None                                           | None                                                                                             | 33/36                                                    | Post-prandial hypoglycaemia. Normal lipid profile. Raised fasting C-peptide (576pmol/L). Mother taking U500 insulin.                           |
| <i>INSR</i>    | NM_000208.4:c.335 6G>A | p.(Arg1119Gln) | Heterozygous | White British | 17                             | Insulin alone     | Father, paternal aunt and uncle type 2 DM. Father heterozygous for the mutation.                         | None                                           | None                                                                                             | 17/19                                                    | None                                                                                                                                           |
| <i>INSR</i>    | NM_000208.4:c.316 4C>T | p.(Ala1055Val) | Heterozygous | White British | 12                             | OHA               | father, two paternal uncles and paternal aunt type 2 DM. Father heterozygous for the mutation.           | None                                           | Acanthosis nigricans.                                                                            | 21/22                                                    | Normal lipid profile. Raised serum testosterone and mildly raised fasting insulin. Father has normal lipid profile and raised fasting insulin. |
| <i>PPARG</i>   | NM_015869.4:c.124 5del | p.(Phe415fs)   | Heterozygous | Black African | 19                             | Insulin alone     | Daughter type 2 DM at age 18 years. Sister and maternal grandmother type 2 DM.                           | None                                           | Partial Lipodystrophy<br>Mild acanthosis<br>Mild hirsutism<br>Irregular periods since early 30's | 45/49                                                    | None                                                                                                                                           |
| <i>SLC29A3</i> | NM_018344.5:c.133 0G>T | p.(Glu444*)    | Homozygous   | South Asian   | 9                              | Insulin alone     | Brother and sister with joint contractures. Sister also type 1 DM. Brother also homozygous for mutation. | Joint contractures                             | Not known                                                                                        | 17/NA                                                    | Lost to follow up                                                                                                                              |

|             |                                                       |                                 |                       |               |    |               |                                                                       |      |                                                                                                                                |       |                                                                                |
|-------------|-------------------------------------------------------|---------------------------------|-----------------------|---------------|----|---------------|-----------------------------------------------------------------------|------|--------------------------------------------------------------------------------------------------------------------------------|-------|--------------------------------------------------------------------------------|
| TRMT1<br>OA | NM_152292.5:c.79G>T                                   | p.(Glu27*)                      | Homozygous            | White British | 30 | Insulin alone | Seven siblings with diabetes                                          | None | Microcephaly and a severe learning disability.                                                                                 | 57/60 | None                                                                           |
| WFS1        | NM_006005.3:c.1885C>T                                 | p.(Arg629Trp)                   | Homozygous            | Arabic        | 5  | Insulin alone | Father, paternal grandfather and maternal grandparents with type 2 DM | None | None                                                                                                                           | 10/16 | Optic atrophy and moderate sensorineural hearing loss diagnosed aged 13 years. |
| WFS1        | NM_006005.3:c.2053C>T and NM_006005.3:c.2254G>T       | p.(Arg685Cys) and p.(Glu752*)   | Compound Heterozygous | White British | 22 | Insulin alone | Three siblings with diabetes                                          | None | Neuropsychiatric disorder & cognitive decline. bladder instability. Ataxia & gait disturbance. Muscle weakness and neuropathy. | 48/53 | Hearing loss.                                                                  |
| WFS1        | NM_006005.3:c.1107_1108insA and NM_006005.3:c.1456C>T | p.(Ala370fs) and p.(Gln486*)    | Compound Heterozygous | South Asian   | 6  | Insulin alone | Maternal uncle and grandfather type 2 DM                              | None | Blurred vision, Optic atrophy diagnosed aged 8 years. Mild behavioural problems.                                               | 13/16 | None                                                                           |
| WFS1        | NM_006005.3:c.1433G>A                                 | p.(Trp478*)                     | Homozygous            | South Asian   | 2  | Insulin alone | Brother type 1 DM at age 2 years and homozygous for mutation          | None | Not known                                                                                                                      | 2/NA  | Lost to follow up                                                              |
| WFS1        | NM_006005.3:c.698_707del                              | p.(Leu233fs)                    | Homozygous            | Arabic        | 8  | Insulin alone | Sister type 1 DM and deafness at age 7 years                          | None | None                                                                                                                           | 12/13 | Bilateral optic atrophy and diabetes insipidus.                                |
| WFS1        | NM_006005.3:c.2020G>A and NM_006005.3:c.2170C>T       | p.(Gly674Arg) and p.(Pro724Ser) | Compound Heterozygous | East Asian    | 17 | OHA + Insulin | Maternal & paternal grandparents' type 2 DM                           | None | Bilateral optic atrophy.                                                                                                       | 19/20 | Mild dyskinesia and abnormal reflexes.                                         |
